# Supplementary material
Source: MDPI journal article supplement (https://www.mdpi.com/2076-3417/7/9/924)
Supplement: s1 [file s1]

# Supplementary Materials: Low-Cost Nanocarbon-Based Peroxidases from Graphite and Carbon Fibers

Yan Zeng, Feifan Miao, Zhiyong Zhao, Yuting Zhu, Tao Liu, Rongsheng Chen, Simin Liu, Zaosheng Lv and Feng Liang

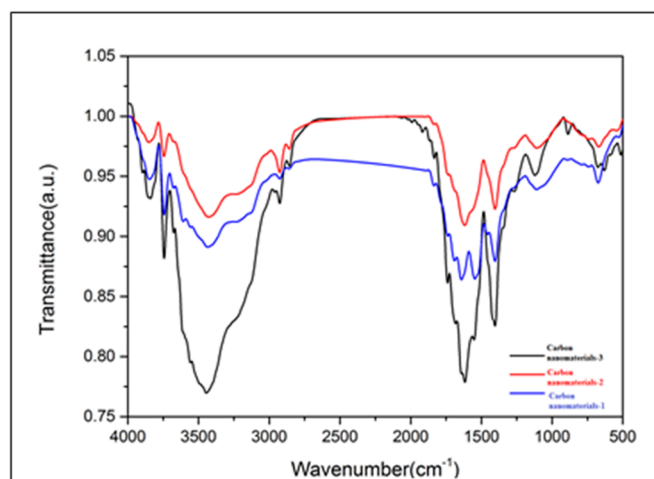

**Figure S1.** Fourier transform infrared spectroscopy (FT-IR) Spectrometer of as-synthesized carbon nanomaterials in this work. FTIR data analysis was performed on a FTIR spectrometer (VERTEX 70, Bruker, Bremen, Germany).

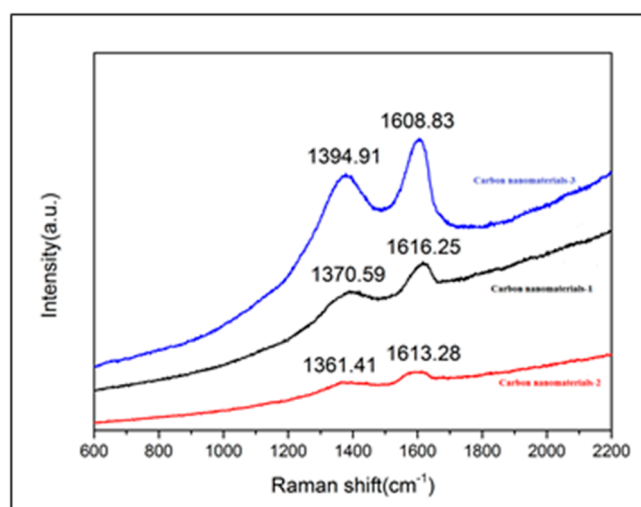

**Figure S2.** Raman spectra of as-synthesized carbon nanomaterials in this work. Raman spectra were acquired with INVIA plus Laser Raman Spectrometer (Renishaw, New Mills, UK).

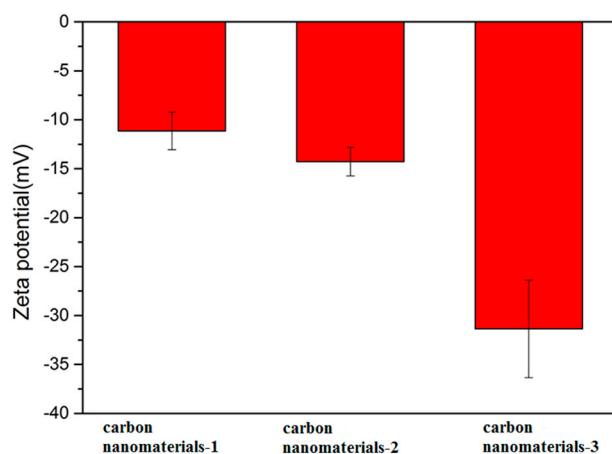

**Figure S3.** Zeta potential of as-synthesized carbon nanomaterials in this work. Zeta potential data were obtained from Zetasizer Nano-ZS ZEN3600 (Malvern, Worcestershire, UK).

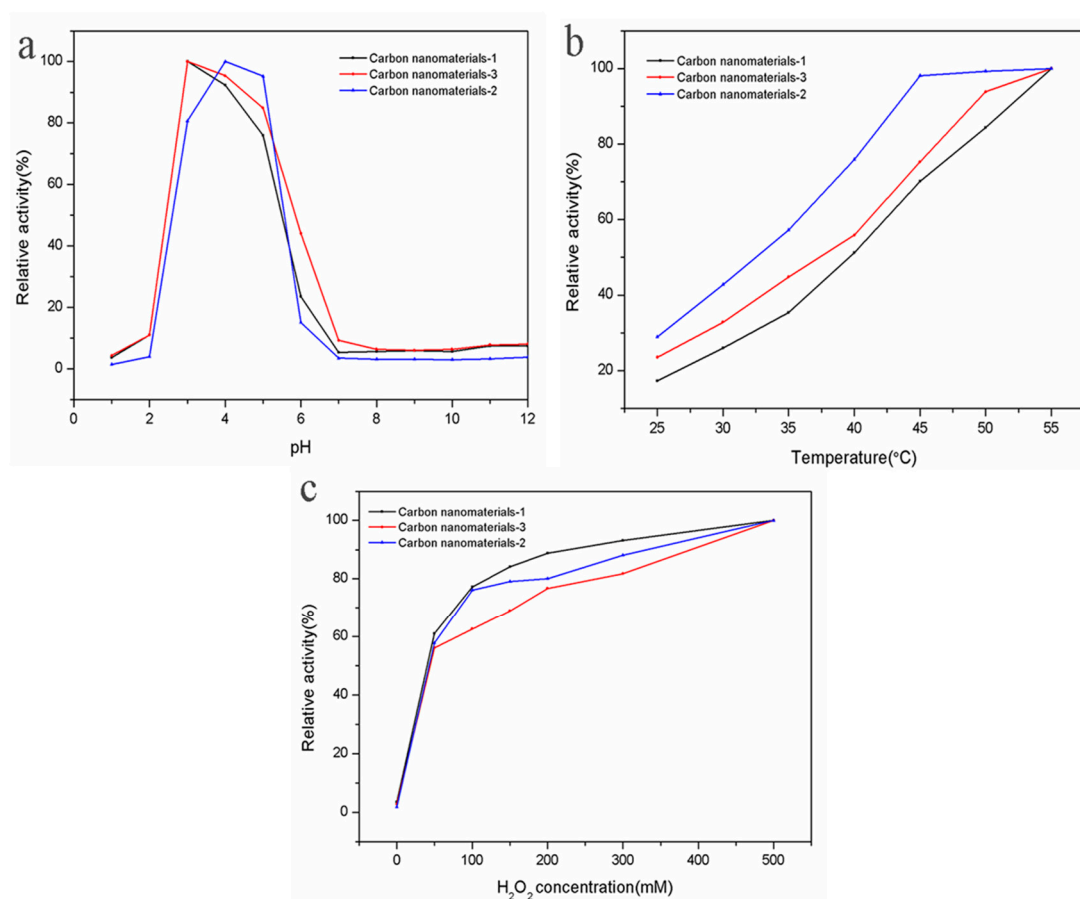

**Figure S4.** Effects of pH value, temperature and H<sub>2</sub>O<sub>2</sub> concentrations on the peroxidase catalytic activities of different carbon nanomaterials. The reaction solution included 40  $\mu\text{g}\cdot\text{mL}^{-1}$  carbon nanomaterials, 800  $\mu\text{M}$  TMB (3,3',5,5'-Tetramethylbenzidine), 50 mM H<sub>2</sub>O<sub>2</sub> (if fixed in a and b), and 25 mM phosphate buffer. The absorbance at 652 nm was recorded after 5 min incubation. The maximum point in each curve was set as 100%. (a) the pH value varied from 1 to 12; (b) temperature was changed from 25 °C to 55 °C; (c) the concentration of H<sub>2</sub>O<sub>2</sub> varied from 0 to 500 mM.

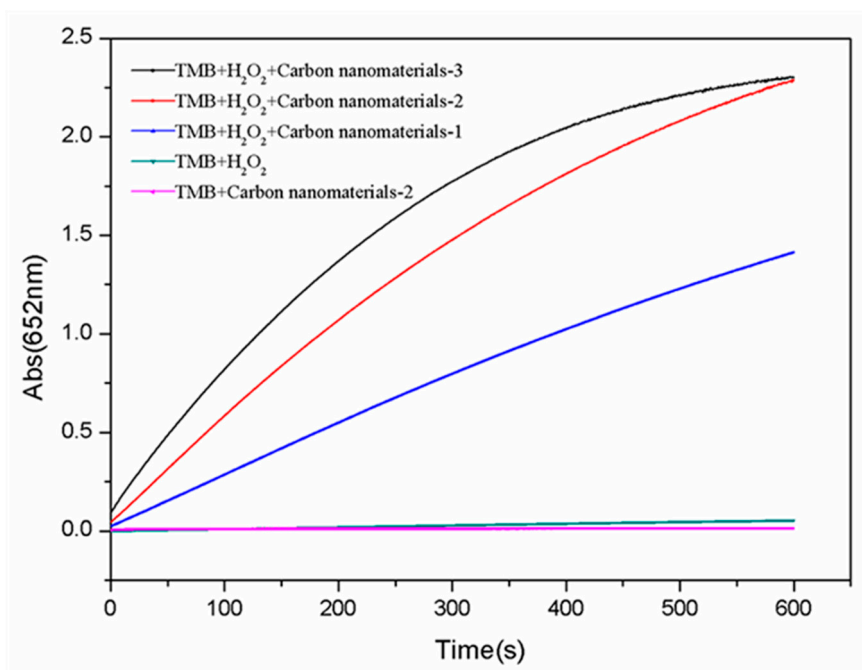

**Figure S5.** The time-dependent absorbance at 652 nm in the presence of 40  $\mu\text{g}\cdot\text{mL}^{-1}$  different carbon nanomaterials, 800  $\mu\text{M}$  TMB and 50 mM  $\text{H}_2\text{O}_2$  in 25 mM phosphate buffer (pH 4.0) at 35 °C.

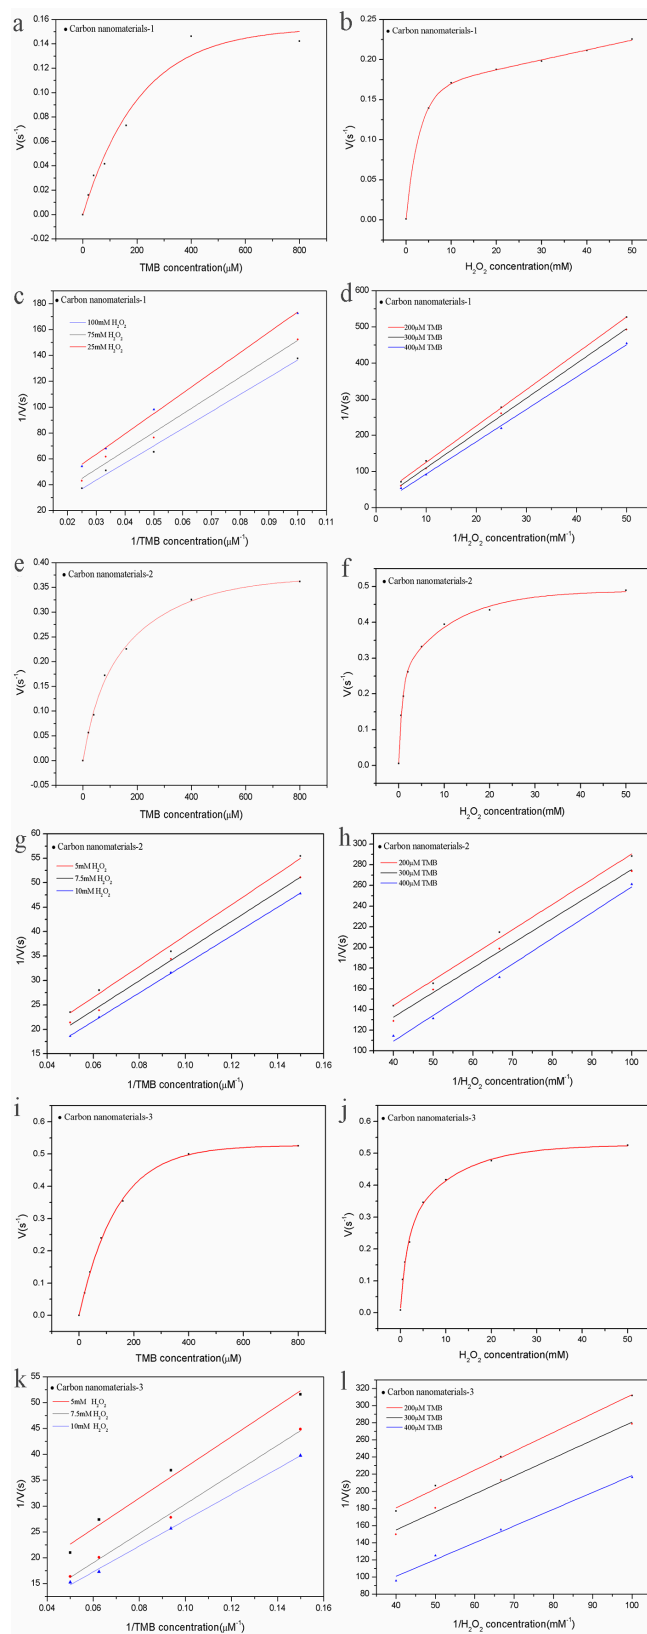

**Figure S6.** The kinetic behaviors for as-prepared carbon nanomaterials. The velocity of the reaction treated with  $40 \mu\text{g}\cdot\text{mL}^{-1}$  of carbon nanomaterials was measured in phosphate buffer (pH 4.0) at  $35^\circ\text{C}$ . In (a), (e), (i), the concentration of  $\text{H}_2\text{O}_2$  was fixed at  $50 \text{ mM}$  and the concentration of TMB was varied; in (b), (f), (j), the concentration of TMB was fixed at  $800 \mu\text{M}$  and the concentration of  $\text{H}_2\text{O}_2$  was varied; (c), (g), (k) and (d), (h), (l) double-reciprocal plots of the activity of carbon nanomaterials at a fixed concentration of one substrate versus different concentration of the second substrate for  $\text{H}_2\text{O}_2$  or TMB. Each point is an average of three successive measurements.
